# Supplementary material for: The effect of rfaD and rfaF of Haemophilus parasuis on lipooligosaccharide induced inflammation by NF-κB/MAPKs signaling in porcine alveolar macrophages
Source: PubMed Central journal article supplement — J Vet Med Sci. 2018 Apr 6;80(5):842–5. doi: 10.1292/jvms.16-0586 (PMC5989033; doi:10.1292/jvms.16-0586), 2018-04-06
Supplement: jvms-80-842-s001.pdf [file jvms-80-842-s001.pdf]

## Supporting information Legends

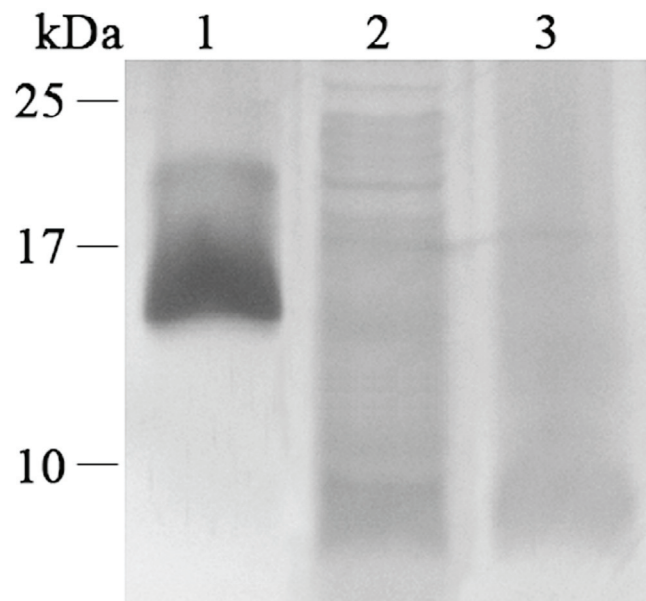

**Fig. S1.** Lipooligosaccharide profiles of wild-type SC096, and *rfaF* and *rfaD* mutants.

Lane 1, wild-type SC096 strain; lane 2, *rfaF* mutant; lane 3, *rfaD* mutant.

**Table 1.** Sequences of the PCR primers used in this study.

| Primers          | Nucleotide sequence (5'-3') | PCR product length (bp) |
|------------------|-----------------------------|-------------------------|
| IL-1 $\beta$ -F  | ACCTGGACCTTGGTTCTCTG        | 83                      |
| IL-1 $\beta$ -R  | CATCTGCCTGATGCTCTTGT        |                         |
| IL-1 $\alpha$ -F | GAAGAAGAGACGGTTGAG          | 109                     |
| IL-1 $\alpha$ -R | GCTGTATGTTGCTGATCT          |                         |
| IL-6-F           | AATCCAGACAAAGCCACCAC        | 79                      |
| IL-6-R           | TCCACTCGTTCTGTGACTGC        |                         |
| IL-8-F           | TAGGACCAGAGCCAGGAAGA        | 92                      |
| IL-8-R           | AGCAGGAAAAGTGCCTAAGAA       |                         |
| TNF- $\alpha$ -F | CCACCAACGTTTTCTCACT         | 82                      |
| TNF- $\alpha$ -R | TTGATGGCAGAGAGGAGGTT        |                         |
| RPL4-F           | GCTCTATGGCACTTGGCGT         | 124                     |
| RPL4-R           | GCGGAGGGCTCTTTGGAT          |                         |
